# Supplementary material for: Study protocol for a cluster-randomized trial to compare human papillomavirus based cervical cancer screening in community-health campaigns versus health facilities in western Kenya
Source: PubMed Central journal article supplement (PMC5717798; doi:10.1186/s12885-017-3818-z), 2017-12-06
Supplement: 12885_2017_3818_MOESM1_ESM.pdf [file 12885_2017_3818_MOESM1_ESM.pdf]

## **WHO Trial Registry Data**

| <b>Data Category</b>                          | <b>Information</b>                                                                                                                 |
|-----------------------------------------------|------------------------------------------------------------------------------------------------------------------------------------|
| Primary registry and trial identifying number | ClinicalTrials.gov, NCT02124252                                                                                                    |
| Date of registration in primary registry      | 25 April 2014                                                                                                                      |
| Secondary identifying numbers                 | R01CA188248                                                                                                                        |
| Source of monetary or material support        | National Institutes of Health/National Cancer Institute                                                                            |
| Primary sponsor                               | National Institutes of Health/National Cancer Institute                                                                            |
| Secondary sponsor                             | n/a                                                                                                                                |
| Contact for public or scientific queries      | Megan Huchko, MD, MPH, megan.huchko@duke.edu                                                                                       |
| Public Title                                  | Evaluating a community-driven cervical cancer prevention protocol in western Kenya                                                 |
| Scientific Title                              | Evaluating a community-driven cervical cancer prevention protocol in western Kenya                                                 |
| Country of recruitment                        | Kenya                                                                                                                              |
| Health Condition Studied                      | Cervical cancer/HPV infection                                                                                                      |
| Intervention                                  | Human papillomavirus-based cervical cancer screening offered in community health campaigns                                         |
| Key Inclusion and exclusion criteria          | Women, aged 25-65 living in target communities in western Kenya                                                                    |
| Study type                                    | Cluster randomized trial                                                                                                           |
| Date of first enrollment                      | January 2016                                                                                                                       |
| Target sample size                            | 7500                                                                                                                               |
| Recruitment status                            | Recruiting                                                                                                                         |
| Primary outcomes                              | Reach and efficacy of community-health campaign based screening                                                                    |
| Key secondary outcomes                        | Cost and cost-effectiveness of the two implementation strategies; process measures associated with more effective service delivery |
